# Supplementary material for: Abnormal Cerebellar Development Is Involved in Dystonia-Like Behaviors and Motor Dysfunction of Autistic BTBR Mice
Source: PubMed Central journal article supplement (PMC7154340; doi:10.3389/fcell.2020.00231), 2020-04-07
Supplement: Table_1.pdf [file Table_1.pdf]

Supplemental Table: The sequence of primers used in this study

| <b>Gene</b>    | <b>Primer sense (5'-3')</b> | <b>Primer antisense (5'-3')</b> |
|----------------|-----------------------------|---------------------------------|
| <i>Dynlt1b</i> | AAAGCGCCATCGGTGGTAAT        | GGTCTTGTTCTCCCATCGGAC           |
| <i>Draxin</i>  | GTCCCAGGCAAGCCATCAT         | CGGGGTAGGGCAAAGTCAG             |
| <i>Rbpj</i>    | AACAGCGATGACATTGGTGTG       | ACCGAAGGCGATTGAACAGTG           |
| <i>Nog</i>     | GGTGTGTAAGCCATCCAAGTCT      | CCGAGTTCTAGCAGGAACACTTAC        |
| <i>Trpc6</i>   | GGTGCGGAAGATGCTAGAAG        | AGCTGGATGGTTGAGGATTG            |
| <i>Bdnf</i>    | GGGTCACAGCGGCAGATAAA        | GCCTTTGGATACCGGGACTT            |
| <i>Camk4</i>   | GAGAACCTCGTCCCGGATTAC       | ACACAATGGATGTAGCACCCC           |
| <i>Trpc3</i>   | AAAGAAAACGATGAGGTGAATGAAG   | CATAACGAAGGCTGGAGATATCCT        |
| <i>Trpc4</i>   | GTGTGCTACCTGATAGCTCCC       | GGCAGAGACACGTTTCGTTATT          |
| <i>Gapdh</i>   | TGGGTGTGAACCACGAGAAA        | AAAGTTGTCATGGATGACCTTGG         |
